# Supplementary material
Source: PubMed Central journal article supplement (PMC6997602)
Supplement: supp_RA119000327_155119_1_supp_428041_q0wz94.pdf [file supp_RA119000327_155119_1_supp_428041_q0wz94.pdf]

## SUPPORTING INFORMATION

**Table S1.** Human cell lines used in these studies and their respective biomarker status and subtype. ER (estrogen receptor), PR (progesterone receptor), HER2 (ErbB2).

| Cell Line  | Source                  | Tumor Type                      | Subtype                   | ER | PR | HER2 |
|------------|-------------------------|---------------------------------|---------------------------|----|----|------|
| BT-474     | Primary breast          | Ductal carcinoma                | Luminal B                 | +  | +  | +    |
| DU4475     | Mammary gland           | Epithelial cell                 | TNBC, IM subtype          | -  | -  | -    |
| HeLa       | Cervix                  | Adenocarcinoma                  | N/A                       |    |    |      |
| MCF-7      | Pleural effusion        | Invasive ductal carcinoma       | Luminal A                 | +  | +  | -    |
| MCF10A     | Primary breast          | Epithelial cell, nontumorigenic | Basal                     | -  | -  | -    |
| MDA-MB-231 | Pleural effusion        | Adenocarcinoma                  | Claudin-low or basal-like | -  | -  | -    |
| LiSa-2     | Pleomorphic liposarcoma | Liposarcoma                     | N/A                       |    | +  |      |
| SKBR3      | Pleural effusion        | Adenocarcinoma                  | Luminal                   | -  | -  | +    |
| T47-D      | Pleural effusion        | Invasive ductal carcinoma       | Luminal A                 | +  | +  | -    |

**Table S2.** Gene primer sequences used for detection in qRT-PCR analysis.

| Gene (GenBank) | Product Designation   |
|----------------|-----------------------|
| ACACA          | Hs01046047_m1 ACACA   |
| ACLY           | Hs00982738_m1 ACLY    |
| ACSS2          | Hs01122829_m1 ACSS2   |
| Cyc            | 4310883E              |
| CD36           | Hs00354519_m1 CD36    |
| DGAT1          | Hs01020362_g1         |
| FASN           | Hs01005622_m1 FASN    |
| GPIHBP1        | Hs01564843_m1 GPIHBP1 |
| HMGCR          | Hs00168352_m1 HMGCR   |
| LDLR           | Hs 01092524_m1 LDLR   |
| LMF1           | Hs01071616_m1 LMF1    |
| LPL            | Hs00173425_m1 LPL     |
| PLIN2          | Hs00605340_m1 PLIN2   |
| SCD            | Hs01682761_m1 SCD     |

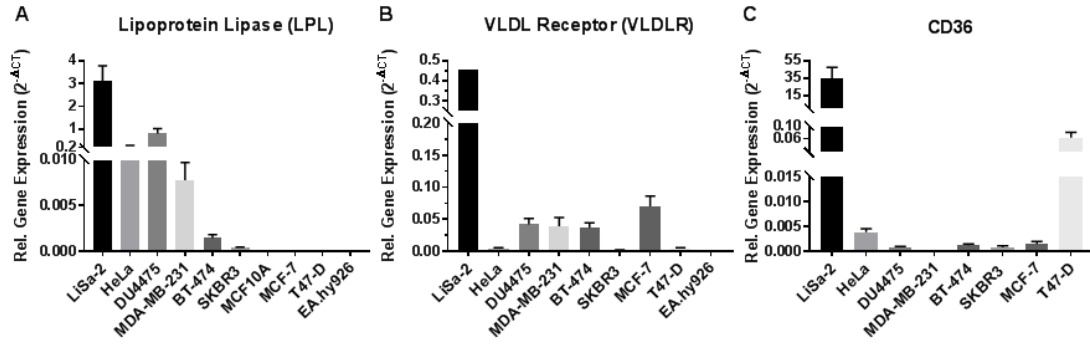

**Figure S1. Cell line expression of select genes involved in FFA and VLDL uptake.** Basal gene expression of (A) LPL, (B) VLDLR, and (C) CD36 was assessed using qRT-PCR (note different scales). Relative expression values are displayed as  $2^{-\Delta CT}$ , with Cq of the target normalized to that of cyclophilin. Data are mean  $\pm$  SEM of  $> 3$  experiments.

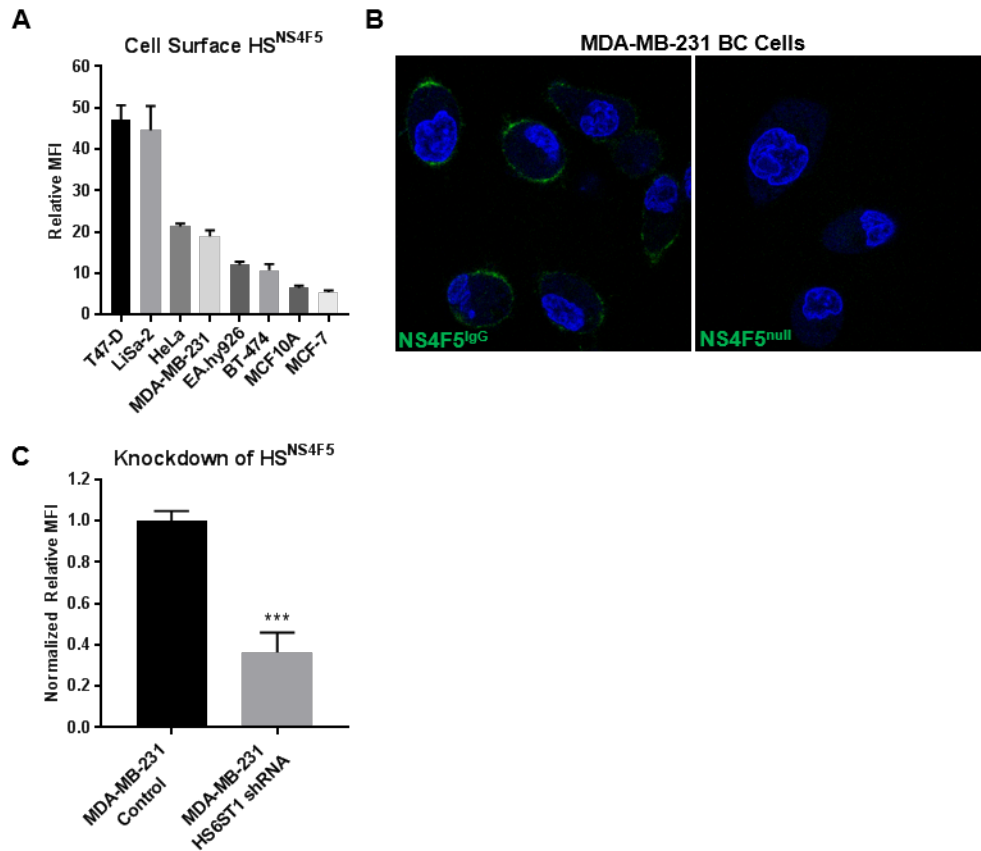

**Figure S2. The HSPG Motif (GlcNS6S-IdoA2S)<sub>3</sub>, a binding site for LPL, is expressed on the surface of cancer cells.** (A) The abundance of HS<sup>NS4F5</sup> on the surface of cell lines was assessed by flow cytometry. Relative MFI is the median fluorescence of cells stained with the NS4F5<sup>IgG</sup>-Dylight 650 antibody normalized to the NS4F5<sup>null</sup>-Dylight 650 control. (B) Confocal microscopy of MDA-MB-231 cells stained with Hoechst 33342 nuclear stain (blue) and DyLight 650 NS4F5<sup>IgG</sup> or NS4F5<sup>null</sup> antibody (green) for 30 min at 4°C localizes HS<sup>NS4F5</sup> to the cell surface. (C) shRNA knockdown of heparan sulfate 6-O-sulfotransferase 1 (HS6ST1) reduces HS<sup>NS4F5</sup> on the surface of MDA-MB-231 BC cells, assessed by flow cytometry. Relative MFI represents the median fluorescence of cells stained with the NS4F5<sup>IgG</sup>-Dylight 650 antibody normalized to those stained with the isotype control, NS4F5<sup>null</sup>-Dylight 650. \*\*\*p < 0.001, two-tailed unpaired t-test with Welch's correction.

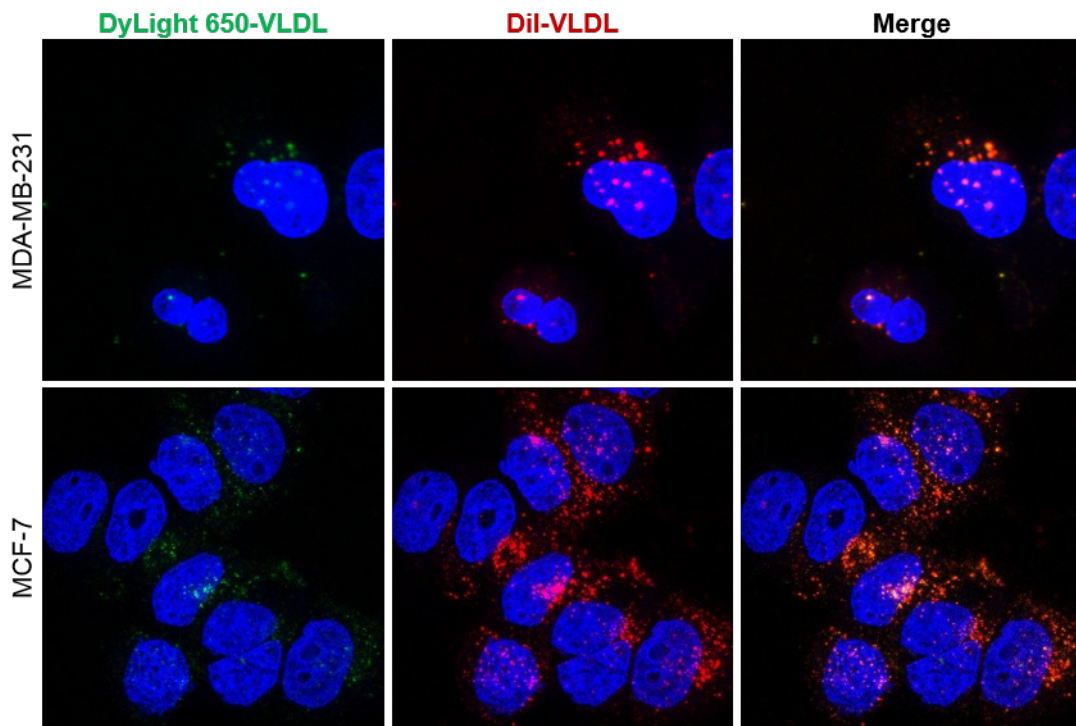

**Figure S3. Both lipid and protein component of VLDL particles bind to- and are internalized by MDA-MB-231 and MCF-7 BC cells.** Confocal microscopy of BC cells incubated with DiI (lipid-) and DyLight 650 (protein-) co-labeled VLDLs. Three channels are shown: Hoechst 33342 nuclear stain (blue), DiI-VLDL (red), DyLight650-VLDL (green). Orange spots (in merged channel) are where DiI and DyLight650 fluorescence coincide.

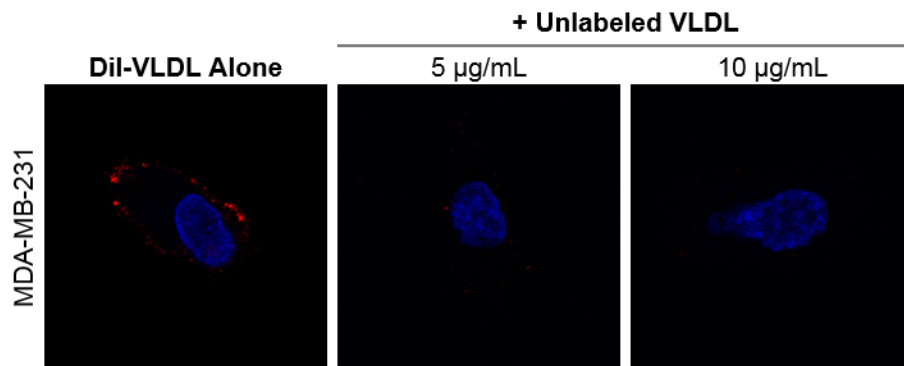

**Figure S4. Cell surface DiI-VLDL binding is specific.** Competition with excess unlabeled VLDL inhibits DiI-VLDL binding at 4°C. MDA-MB-231 cells were treated with DiI-VLDL (5 µg/mL) with or without unlabeled VLDL (5 or 10 µg/mL). DiI-VLDL (red); DAPI nuclear stain (blue).

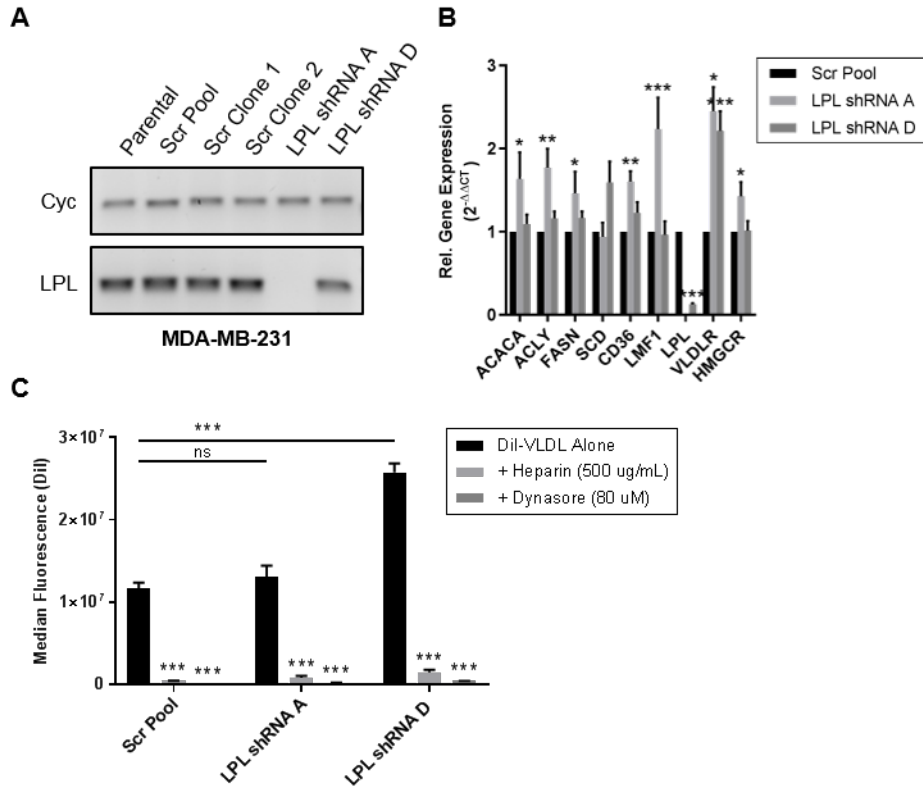

**Figure S5. Characterization of MDA-MB-231 LPL shRNA cell lines.** (A) qRT-PCR products run on agarose gels. Parental and scrambled shRNA cell lines are compared to LPL shRNA A (complete knockdown of LPL) and LPL shRNA D (partial knockdown). (B) qRT-PCR of MDA-MB-231 manipulated cell lines normalized to the pooled control. LPL shRNA A cells exhibit significant upregulation of mRNAs involved in *de novo* lipid synthesis (ACACA, ACLY, FASN), cholesterol synthesis (HMGCR), and FA uptake (CD36, LMF1, VLDLR). MDA-MB-231 LPL shRNA D (partial LPL knockdown) cells display a significant upregulation of VLDLR expression alone. \* $P < 0.05$ , \*\* $p < 0.01$ , \*\*\* $p < 0.001$ . Error is SEM. (C) Comparison of DiI-VLDL uptake in Scr and LPL shRNA cells with and without treatment (heparin 500  $\mu$ g/mL; dynasore 80  $\mu$ M), measured by flow cytometry. MDA-MB-231 LPL shRNA D cells had significantly higher DiI-VLDL uptake than either the Scr control or LPL shRNA A cells, \*\*\* $p < 0.001$ . All three cell lines showed significant reductions in DiI-VLDL uptake following treatment with heparin or dynasore, \*\*\* $p < 0.001$ .

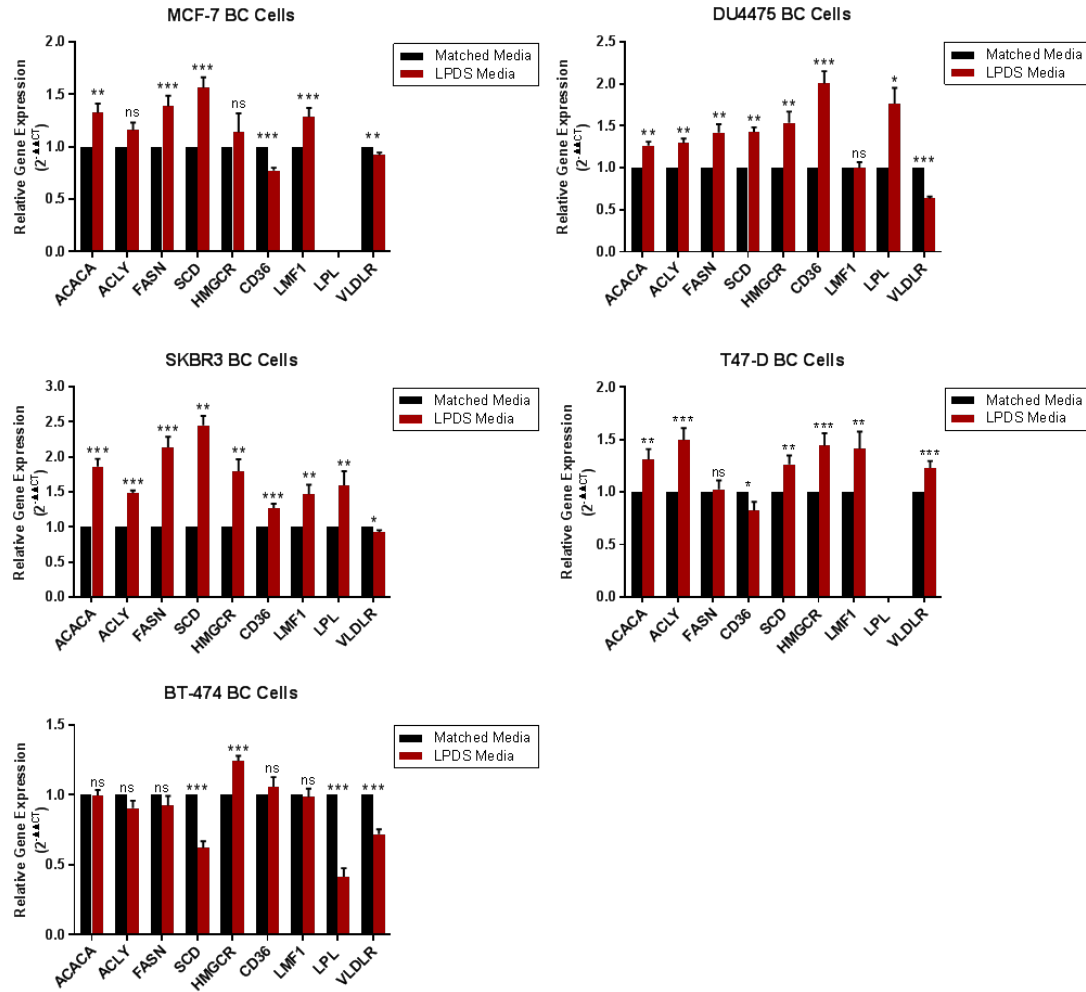

**Figure S6. Trends in the expression of FA metabolic genes in BC cell lines cultured in lipoprotein-depleted serum media for 96 h.** Gene expression was measured using qRT-PCR. Results were calculated using the 2<sup>-ΔΔCT</sup> method first normalized to cyclophilin, and then made relative to that of the matched FBS media control. Data are from > 3 experiments; error is SEM. Statistical significance determined using two-tailed unpaired t-tests: \*P < 0.05, \*\*p < 0.01, \*\*\*p < 0.001.
